# Supplementary material for: Free-energy predictions and absorption spectra calculations for supramolecular nanocarriers and their photoactive cargo
Source: Royal Society of Chemistry journal article supplement (doi:10.1039/c7nr00839b), 2017-01-01
Supplement: c7nr00839b1.pdf [file c7nr00839b1.pdf]

## Supplementary Information

# Free-energy predictions and absorption spectra calculations for supramolecular nanocarriers and their photoactive cargo

Adriana Pietropaolo,<sup>\*a</sup> Sicheng Tang<sup>b</sup> and Francisco M. Raymo<sup>\*b</sup>

<sup>a</sup> Dipartimento di Scienze della Salute, Università di Catanzaro, Viale Europa 88100, Catanzaro; E-mail: apietropaolo@unicz.it

<sup>b</sup> Laboratory for Molecular Photonics, Department of Chemistry, University of Miami, 1301 Memorial Drive, Coral Gables, FL 33146-0431, USA; E-mail: fraymo@miami.edu

## Contents

|                                                              |     |
|--------------------------------------------------------------|-----|
| 1. Details on the electronic absorption spectra calculations | S2  |
| 2. Tables of the oscillator strengths                        | S3  |
| 3. Tables of the coordinates of BODIPY chromophores          | S7  |
| 4. Figures of the free-energy convergence                    | S15 |

### *Details on the Electronic absorption spectra calculations*

The oscillator strengths were calculated for the monomer and stacked BODIPY chromophores. In particular, we clustered the BODIPY molecules belonging to each nanoparticle free-energy minima. Those resulted in two sets of clusters for the BODIPY monomer and one set of clusters for dimers and trimers.

Fifty singlet excited states were calculated at the TD-DFT framework with the B97-D<sup>1</sup> functional and 6-31G\*\* basis sets using Gaussian 09 package.<sup>2</sup>

The oscillator strengths  $f_{0n}$  are related to the transition dipole moment<sup>3</sup> by equation 5)

$$f^{0n} = \frac{2}{3} \omega^{0n} |\boldsymbol{\mu}^{0n}|^2 \quad 5)$$

$\boldsymbol{\mu}_{0n}$  is the electric transition dipole moment associated with an electronic transition  $0 \rightarrow n$  and  $\omega^{0n}$  are the excitation energies for the specific transition.<sup>3,4</sup>

The calculations of the absorption spectra at a given wavelength,  $\lambda$ , were done assuming Gaussian bands with  $600 \text{ cm}^{-1}$  full width at half-height (from 200 nm to 800 nm) for all transitions centered in a given excitation wavelength. A factor of  $2.8710^4$  was applied in order to account for the conversion between oscillator strengths and the molar extinction coefficients.<sup>5</sup>

The values of the oscillator strengths calculated at TD-DFT level, within the B97-D functional<sup>19</sup> and 6-31G\*\* basis sets, are reported below.

**Table S1.** Oscillator strengths and relative wavelengths for the BODIPY monomer.

|        |        |
|--------|--------|
| 0.0586 | 526.64 |
| 0.4241 | 455.26 |
| 0.0032 | 431.44 |
| 0.0547 | 378.54 |
| 0.1477 | 364.89 |
| 0.0135 | 347.05 |
| 0.0050 | 326.44 |
| 0.0699 | 324.62 |
| 0.0049 | 301.71 |
| 0.0397 | 297.82 |
| 0.0192 | 295.97 |
| 0.0156 | 290.00 |
| 0.0054 | 264.59 |
| 0.0100 | 262.72 |
| 0.0086 | 260.77 |
| 0.0037 | 258.25 |
| 0.0010 | 256.08 |
| 0.0006 | 248.16 |
| 0.0012 | 242.32 |
| 0.0292 | 240.88 |
| 0.0534 | 239.78 |
| 0.0058 | 236.33 |
| 0.0036 | 235.43 |
| 0.0345 | 229.97 |
| 0.0161 | 228.69 |
| 0.0006 | 226.76 |
| 0.0156 | 224.69 |
| 0.0011 | 221.35 |
| 0.0003 | 219.68 |
| 0.0851 | 214.17 |
| 0.0090 | 210.71 |
| 0.0075 | 208.57 |
| 0.0106 | 207.99 |
| 0.0271 | 205.67 |
| 0.0053 | 205.09 |
| 0.0048 | 202.91 |
| 0.0009 | 201.21 |
| 0.0190 | 200.56 |
| 0.0014 | 198.54 |
| 0.0258 | 198.00 |
| 0.0673 | 197.43 |
| 0.0632 | 197.26 |
| 0.0025 | 196.18 |
| 0.0056 | 195.70 |
| 0.0055 | 194.69 |
| 0.0036 | 194.25 |
| 0.0012 | 193.86 |
| 0.1104 | 192.17 |
| 0.0433 | 191.36 |
| 0.0467 | 191.03 |

**Table S2.** Oscillator strengths and relative wavelengths for the second BODIPY monomer.

|               |               |
|---------------|---------------|
| <b>0.2853</b> | <b>461.75</b> |
| <b>0.1973</b> | <b>26.78</b>  |
| <b>0.0024</b> | <b>376.76</b> |
| <b>0.0187</b> | <b>375.01</b> |
| <b>0.0025</b> | <b>303.97</b> |
| <b>0.0016</b> | <b>295.49</b> |
| <b>0.0068</b> | <b>287.46</b> |
| <b>0.0093</b> | <b>278.13</b> |
| <b>0.0013</b> | <b>273.58</b> |
| <b>0.0294</b> | <b>272.48</b> |
| <b>0.0003</b> | <b>265.68</b> |
| <b>0.0003</b> | <b>255.38</b> |
| <b>0.0040</b> | <b>253.50</b> |
| <b>0.0034</b> | <b>252.65</b> |
| <b>0.0020</b> | <b>249.79</b> |
| <b>0.0025</b> | <b>239.29</b> |
| <b>0.1592</b> | <b>237.25</b> |
| <b>0.0101</b> | <b>230.99</b> |
| <b>0.0375</b> | <b>228.92</b> |
| <b>0.0050</b> | <b>224.10</b> |
| <b>0.0007</b> | <b>222.56</b> |
| <b>0.0071</b> | <b>222.39</b> |
| <b>0.1013</b> | <b>220.52</b> |
| <b>0.0034</b> | <b>220.11</b> |
| <b>0.0088</b> | <b>216.89</b> |
| <b>0.0128</b> | <b>215.75</b> |
| <b>0.0027</b> | <b>214.31</b> |
| <b>0.0013</b> | <b>211.90</b> |
| <b>0.0079</b> | <b>211.01</b> |
| <b>0.0054</b> | <b>208.29</b> |
| <b>0.0002</b> | <b>207.69</b> |
| <b>0.0014</b> | <b>206.66</b> |
| <b>0.0189</b> | <b>203.77</b> |
| <b>0.0020</b> | <b>203.11</b> |
| <b>0.0043</b> | <b>201.86</b> |
| <b>0.0053</b> | <b>201.48</b> |
| <b>0.0155</b> | <b>199.75</b> |
| <b>0.0106</b> | <b>198.40</b> |
| <b>0.0106</b> | <b>198.30</b> |
| <b>0.0008</b> | <b>197.06</b> |
| <b>0.0078</b> | <b>196.44</b> |
| <b>0.0166</b> | <b>195.81</b> |
| <b>0.0125</b> | <b>194.97</b> |
| <b>0.0067</b> | <b>194.05</b> |
| <b>0.0510</b> | <b>193.82</b> |
| <b>0.0013</b> | <b>192.54</b> |
| <b>0.0061</b> | <b>192.03</b> |

**Table S3.** Oscillator strengths and relative wavelengths for the BODIPY dimer.

|               |               |
|---------------|---------------|
| <b>0.0014</b> | <b>788.63</b> |
| <b>0.0011</b> | <b>586.83</b> |
| <b>0.0009</b> | <b>562.11</b> |
| <b>0.0039</b> | <b>514.13</b> |
| <b>0.0238</b> | <b>492.59</b> |
| <b>0.0005</b> | <b>475.13</b> |
| <b>0.0116</b> | <b>463.75</b> |
| <b>0.0963</b> | <b>456.93</b> |
| <b>0.4864</b> | <b>427.41</b> |
| <b>0.0207</b> | <b>417.51</b> |
| <b>0.0058</b> | <b>413.97</b> |
| <b>0.3672</b> | <b>403.93</b> |
| <b>0.0104</b> | <b>399.22</b> |
| <b>0.0005</b> | <b>391.39</b> |
| <b>0.0003</b> | <b>380.31</b> |
| <b>0.0000</b> | <b>379.34</b> |
| <b>0.0005</b> | <b>371.80</b> |
| <b>0.0067</b> | <b>361.18</b> |
| <b>0.0090</b> | <b>358.39</b> |
| <b>0.0002</b> | <b>317.97</b> |
| <b>0.0000</b> | <b>316.21</b> |
| <b>0.0002</b> | <b>312.23</b> |
| <b>0.0005</b> | <b>311.99</b> |
| <b>0.0016</b> | <b>308.27</b> |
| <b>0.0030</b> | <b>305.70</b> |
| <b>0.0385</b> | <b>303.32</b> |
| <b>0.0596</b> | <b>302.58</b> |
| <b>0.0074</b> | <b>302.39</b> |
| <b>0.0001</b> | <b>302.15</b> |
| <b>0.0027</b> | <b>299.45</b> |
| <b>0.0038</b> | <b>297.47</b> |
| <b>0.0002</b> | <b>296.76</b> |
| <b>0.0005</b> | <b>295.66</b> |
| <b>0.0040</b> | <b>294.23</b> |
| <b>0.0349</b> | <b>293.49</b> |
| <b>0.0000</b> | <b>290.14</b> |
| <b>0.0020</b> | <b>288.50</b> |
| <b>0.0488</b> | <b>285.30</b> |
| <b>0.0001</b> | <b>283.58</b> |
| <b>0.0011</b> | <b>283.05</b> |

**Table S4.** Oscillator strengths and relative wavelengths for the BODIPY trimer.

|        |        |
|--------|--------|
| 0.0002 | 822.31 |
| 0.0011 | 772.46 |
| 0.0022 | 734.21 |
| 0.0024 | 660.64 |
| 0.0031 | 651.72 |
| 0.0003 | 610.69 |
| 0.0002 | 574.06 |
| 0.0001 | 567.27 |
| 0.0026 | 530.82 |
| 0.0022 | 526.26 |
| 0.0002 | 515.03 |
| 0.0007 | 507.78 |
| 0.0189 | 497.80 |
| 0.0283 | 481.77 |
| 0.0072 | 480.34 |
| 0.0313 | 477.10 |
| 0.0020 | 473.36 |
| 0.0354 | 472.51 |
| 0.0176 | 465.78 |
| 0.0028 | 455.91 |
| 0.1471 | 453.78 |
| 0.0232 | 447.67 |
| 0.6588 | 440.82 |
| 0.0205 | 438.93 |
| 0.0258 | 432.40 |
| 0.0020 | 420.87 |
| 0.0016 | 417.78 |
| 0.1538 | 415.14 |
| 0.0022 | 414.03 |
| 0.0066 | 412.70 |
| 0.0003 | 395.36 |
| 0.0099 | 389.89 |
| 0.0070 | 384.38 |
| 0.0000 | 384.15 |
| 0.0001 | 383.47 |
| 0.0026 | 380.32 |
| 0.0013 | 377.69 |
| 0.0554 | 376.07 |
| 0.0074 | 374.91 |
| 0.0169 | 369.98 |
| 0.0405 | 368.26 |
| 0.0021 | 364.22 |
| 0.0024 | 364.13 |
| 0.0545 | 361.22 |
| 0.0789 | 359.91 |
| 0.0295 | 359.43 |
| 0.1640 | 355.57 |
| 0.0039 | 353.37 |
| 0.0442 | 351.79 |
| 0.0093 | 349.57 |

**Table S5.** Coordinates of the first monomer BODIPY conformer.  
Absolute energy= -1226.06069 Hartree

|   |        |         |        |
|---|--------|---------|--------|
| C | 9.792  | -20.332 | 25.231 |
| H | 10.175 | -19.476 | 25.827 |
| H | 9.13   | -20.084 | 24.374 |
| H | 9.323  | -21.076 | 25.909 |
| N | 12.302 | -20.962 | 25.143 |
| C | 11.045 | -20.979 | 24.632 |
| C | 11.084 | -21.728 | 23.462 |
| C | 12.362 | -22.247 | 23.328 |
| C | 13.132 | -21.708 | 24.326 |
| C | 9.951  | -22.146 | 22.714 |
| H | 9.22   | -21.31  | 22.726 |
| H | 10.342 | -22.34  | 21.693 |
| C | 9.312  | -23.517 | 23.132 |
| H | 10.071 | -24.321 | 23.238 |
| H | 8.479  | -23.868 | 22.487 |
| H | 8.834  | -23.392 | 24.128 |
| C | 12.737 | -23.278 | 22.228 |
| H | 13.351 | -23.978 | 22.834 |
| H | 11.939 | -23.93  | 21.812 |
| H | 13.332 | -22.818 | 21.411 |
| F | 12.622 | -18.997 | 26.495 |
| F | 12.004 | -20.925 | 27.574 |
| B | 12.767 | -20.318 | 26.578 |
| C | 14.568 | -21.856 | 24.642 |
| N | 14.297 | -20.649 | 26.725 |
| C | 15.085 | -20.14  | 27.777 |
| C | 16.435 | -20.433 | 27.479 |
| C | 16.454 | -21.179 | 26.341 |
| C | 15.117 | -21.294 | 25.82  |
| C | 14.53  | -19.35  | 28.902 |
| H | 13.533 | -19.747 | 29.189 |
| H | 14.42  | -18.327 | 28.484 |
| H | 15.2   | -19.545 | 29.767 |
| C | 17.524 | -20.15  | 28.457 |
| H | 17.168 | -19.186 | 28.881 |
| H | 18.499 | -20.013 | 27.943 |
| C | 17.942 | -21.22  | 29.4   |
| H | 18.28  | -22.138 | 28.872 |
| H | 17.017 | -21.483 | 29.955 |
| H | 18.681 | -20.839 | 30.137 |
| C | 17.801 | -21.599 | 25.786 |
| H | 18.707 | -21.216 | 26.303 |
| H | 17.886 | -21.304 | 24.718 |
| H | 17.921 | -22.701 | 25.869 |
| C | 15.438 | -22.369 | 23.757 |
| C | 15.681 | -21.905 | 22.471 |
| H | 15.336 | -20.941 | 22.127 |
| C | 16.481 | -22.563 | 21.54  |
| H | 16.651 | -22.189 | 20.541 |
| C | 17.03  | -23.745 | 21.992 |
| H | 17.592 | -24.225 | 21.204 |
| C | 16.088 | -23.589 | 24.156 |
| H | 15.842 | -23.971 | 25.135 |

|   |        |         |        |
|---|--------|---------|--------|
| C | 16.819 | -24.275 | 23.189 |
| H | 17.254 | -25.244 | 23.383 |

**Table S6.** Coordinates of the second monomer BODIPY conformer.  
Absolute energy= -1226.06941 Hartree

|   |           |           |           |
|---|-----------|-----------|-----------|
| C | 2.852334  | -3.250029 | -0.505486 |
| H | 3.493053  | -3.519099 | 0.360118  |
| H | 2.034505  | -4.000081 | -0.453048 |
| H | 3.369696  | -3.432731 | -1.471525 |
| 7 | 1.177704  | -1.343738 | -0.216555 |
| C | 2.428966  | -1.806703 | -0.389742 |
| C | 3.318316  | -0.711327 | -0.321304 |
| C | 2.643598  | 0.382824  | -0.163248 |
| C | 1.255335  | 0.027118  | -0.151225 |
| C | 4.780781  | -0.947280 | -0.435206 |
| H | 4.978780  | -1.865395 | -1.029526 |
| H | 5.289056  | -0.097829 | -0.938911 |
| C | 5.367719  | -1.141802 | 0.967308  |
| H | 6.454443  | -1.305956 | 0.805312  |
| H | 4.923165  | -2.057131 | 1.414864  |
| H | 5.081318  | -0.315621 | 1.652288  |
| C | 3.377407  | 1.721778  | 0.092001  |
| H | 3.685274  | 2.185212  | -0.869664 |
| H | 2.654044  | 2.404860  | 0.587033  |
| H | 4.239720  | 1.499222  | 0.755767  |
| F | -0.401653 | -3.238504 | -0.957210 |
| F | 0.085518  | -2.841153 | 1.340638  |
| B | -0.064040 | -2.221709 | 0.073124  |
| C | 0.075330  | 0.810753  | -0.041219 |
| N | -1.339629 | -1.212801 | 0.130301  |
| C | -2.652452 | -1.515156 | 0.256706  |
| C | -3.473913 | -0.347762 | 0.136616  |
| C | -2.572937 | 0.707119  | 0.038221  |
| C | -1.229414 | 0.208025  | 0.026355  |
| C | -3.256436 | -2.905733 | 0.542861  |
| H | -2.531331 | -3.722273 | 0.333640  |
| H | -4.155525 | -3.202291 | -0.037842 |
| H | -3.362958 | -2.847548 | 1.647655  |
| C | -4.964134 | -0.406812 | 0.254624  |
| H | -5.273781 | 0.658520  | 0.195333  |
| H | -5.241064 | -0.667108 | 1.298622  |
| C | -5.744115 | -0.927623 | -0.908402 |
| H | -5.346775 | -0.328296 | -1.754770 |
| H | -6.828231 | -0.705513 | -0.805906 |
| H | -5.586134 | -2.012863 | -1.085871 |
| C | -3.055786 | 2.141123  | -0.179184 |
| H | -3.988354 | 2.205012  | -0.779975 |
| H | -2.293463 | 2.853197  | -0.561938 |
| H | -3.242609 | 2.475567  | 0.864072  |
| C | 0.242259  | 2.157917  | 0.006173  |
| C | 0.824636  | 2.872341  | -1.041099 |
| H | 1.320325  | 2.263697  | -1.783620 |
| C | 0.886028  | 4.290640  | -0.992337 |
| H | 1.396336  | 4.805860  | -1.792519 |



|   |           |          |          |
|---|-----------|----------|----------|
| C | 0.289676  | 4.918236 | 0.084869 |
| H | 0.431472  | 5.977003 | 0.242229 |
| C | -0.382009 | 2.803147 | 1.024526 |
| H | -0.714579 | 2.193363 | 1.851463 |
| C | -0.288012 | 4.180729 | 1.080216 |
| H | -0.826553 | 4.710307 | 1.851877 |

**Table S7.** Coordinates of the stacked BODIPY dimer.  
Absolute energy= -2452.17921 Hartree

|   |           |           |           |
|---|-----------|-----------|-----------|
| C | -5.904237 | -1.357033 | -1.912119 |
| H | -6.860510 | -0.921805 | -1.551922 |
| H | -5.579882 | -0.658866 | -2.713137 |
| H | -6.086311 | -2.305875 | -2.462069 |
| N | -4.092206 | -0.433321 | -0.332121 |
| C | -4.879723 | -1.486118 | -0.762734 |
| C | -4.413022 | -2.613980 | -0.065333 |
| C | -3.501015 | -2.198013 | 0.862693  |
| C | -3.261440 | -0.828340 | 0.671184  |
| C | -4.977962 | -3.925986 | -0.300155 |
| H | -5.000624 | -4.412182 | 0.698019  |
| H | -6.026991 | -3.798330 | -0.643527 |
| C | -4.062696 | -4.624784 | -1.266663 |
| H | -2.979149 | -4.587538 | -1.022392 |
| H | -4.138880 | -4.146867 | -2.266222 |
| H | -4.444464 | -5.667894 | -1.271094 |
| C | -2.821179 | -3.102614 | 1.904003  |
| H | -3.136942 | -4.163947 | 1.814008  |
| H | -1.728344 | -2.999858 | 1.734904  |
| H | -3.150060 | -2.664543 | 2.870939  |
| F | -4.085486 | 1.241511  | -2.257313 |
| F | -5.468719 | 1.543342  | -0.505024 |
| B | -4.210610 | 1.029304  | -0.875158 |
| C | -2.376883 | 0.124663  | 1.338772  |
| N | -3.171846 | 1.895076  | -0.008011 |
| C | -2.995654 | 3.228270  | -0.185669 |
| C | -1.983491 | 3.657360  | 0.673259  |
| C | -1.525139 | 2.586988  | 1.329792  |
| C | -2.328660 | 1.495526  | 0.968569  |
| C | -3.859879 | 4.144226  | -1.004393 |
| H | -3.639368 | 5.185260  | -0.683791 |
| H | -4.932526 | 3.884654  | -0.884600 |
| H | -3.627346 | 4.126374  | -2.090714 |
| C | -1.321701 | 4.968525  | 0.600229  |
| H | -1.474844 | 5.242525  | -0.465511 |
| H | -0.239820 | 4.907480  | 0.843403  |
| C | -1.839509 | 6.011003  | 1.600471  |
| H | -1.146627 | 6.849121  | 1.825643  |
| H | -2.022136 | 5.494872  | 2.566657  |
| H | -2.770326 | 6.463623  | 1.194219  |
| C | -0.495541 | 2.689448  | 2.397942  |
| H | -0.117210 | 1.682329  | 2.674674  |
| H | -1.021958 | 3.057452  | 3.304052  |
| H | 0.378655  | 3.331499  | 2.155848  |
| C | -1.629105 | -0.249436 | 2.396880  |

|   |           |           |           |
|---|-----------|-----------|-----------|
| C | -0.347087 | -0.762202 | 2.172718  |
| H | 0.096445  | -0.770089 | 1.188291  |
| C | 0.340660  | -1.260812 | 3.239271  |
| H | 1.264786  | -1.808351 | 3.124933  |
| C | -0.095632 | -1.214577 | 4.540631  |
| H | 0.510742  | -1.562949 | 5.363510  |
| C | -2.110151 | -0.248635 | 3.693903  |
| H | -3.039936 | 0.279037  | 3.848567  |
| C | -1.296257 | -0.615084 | 4.791987  |
| H | -1.641505 | -0.439500 | 5.799302  |
| C | 0.672708  | 3.234817  | -1.963943 |
| H | 0.924453  | 4.282907  | -2.231809 |
| H | 0.268624  | 2.645104  | -2.814593 |
| H | -0.158750 | 3.227178  | -1.226887 |
| N | 1.964056  | 1.161044  | -1.185048 |
| C | 1.927355  | 2.568308  | -1.282985 |
| C | 3.113576  | 3.040685  | -0.749275 |
| C | 3.909480  | 1.986516  | -0.390905 |
| C | 3.183239  | 0.789472  | -0.590929 |
| C | 3.413968  | 4.469156  | -0.751794 |
| H | 2.407360  | 4.891413  | -0.544908 |
| H | 4.020374  | 4.744868  | 0.136211  |
| C | 4.042560  | 5.119161  | -2.000535 |
| H | 5.063575  | 4.681782  | -2.027538 |
| H | 4.048450  | 6.213219  | -1.806648 |
| H | 3.482320  | 4.820283  | -2.911280 |
| C | 5.251293  | 2.227846  | 0.253379  |
| H | 5.889422  | 1.336070  | 0.078768  |
| H | 5.634901  | 3.182890  | -0.165985 |
| H | 4.970087  | 2.267801  | 1.327517  |
| 9 | -0.396721 | 0.272748  | -1.329861 |
| 9 | 1.070755  | 0.432826  | -3.178344 |
| 5 | 0.938983  | 0.127944  | -1.791572 |
| C | 3.489075  | -0.559847 | -0.345392 |
| N | 1.384709  | -1.330198 | -1.483012 |
| C | 0.794113  | -2.518551 | -1.737137 |
| C | 1.593830  | -3.565458 | -1.245880 |
| C | 2.696064  | -3.027955 | -0.629406 |
| C | 2.660774  | -1.620404 | -0.769804 |
| C | -0.552128 | -2.572574 | -2.457218 |
| H | -1.387327 | -2.263790 | -1.792237 |
| H | -0.921145 | -3.519783 | -2.906775 |
| H | -0.460299 | -1.751176 | -3.199678 |
| C | 1.079218  | -4.892833 | -1.342420 |
| H | 1.948311  | -5.583203 | -1.395140 |
| H | 0.582781  | -4.998480 | -2.330777 |
| C | 0.166638  | -5.316267 | -0.240742 |
| H | -0.683473 | -4.603572 | -0.191668 |
| H | 0.718796  | -5.201096 | 0.717524  |
| H | -0.053386 | -6.396037 | -0.384039 |
| C | 3.748510  | -3.932732 | -0.021801 |
| H | 3.115497  | -4.765175 | 0.353981  |
| H | 4.163941  | -3.375147 | 0.844246  |
| H | 4.576940  | -4.309351 | -0.659605 |
| C | 4.731527  | -0.894341 | 0.172881  |
| C | 5.037591  | -0.597877 | 1.460885  |
| H | 4.396273  | 0.009731  | 2.082375  |

|   |          |           |           |
|---|----------|-----------|-----------|
| C | 6.242234 | -0.885181 | 2.007095  |
| H | 6.343210 | -0.699048 | 3.065807  |
| C | 7.208326 | -1.506476 | 1.214203  |
| H | 8.131714 | -1.845335 | 1.661250  |
| C | 5.670847 | -1.563425 | -0.584649 |
| H | 5.429675 | -1.770382 | -1.616483 |
| C | 6.954714 | -1.843821 | -0.108652 |
| H | 7.688239 | -2.405267 | -0.669043 |

**Table S8.** Coordinates of the stacked BODIPY trimer.  
Absolute energy= -3678.27120 Hartree

|   |          |           |           |
|---|----------|-----------|-----------|
| C | 7.616597 | -2.774530 | -2.561910 |
| H | 7.209910 | -2.323643 | -3.492604 |
| H | 8.696911 | -2.549861 | -2.434908 |
| H | 7.481128 | -3.875519 | -2.615445 |
| N | 6.678232 | -1.069075 | -0.899169 |
| C | 6.966081 | -2.379718 | -1.273149 |
| C | 6.495835 | -3.258712 | -0.312427 |
| C | 5.915966 | -2.545440 | 0.696359  |
| C | 6.043529 | -1.127611 | 0.299761  |
| C | 6.959348 | -4.634956 | -0.231385 |
| H | 7.958728 | -4.743324 | -0.703619 |
| H | 7.256847 | -5.081139 | 0.741959  |
| C | 6.037239 | -5.619613 | -0.841354 |
| H | 5.584181 | -5.300577 | -1.804451 |
| H | 5.222215 | -5.755292 | -0.099155 |
| H | 6.536917 | -6.568108 | -1.133441 |
| C | 5.080925 | -3.190015 | 1.718268  |
| H | 5.636520 | -3.241986 | 2.679647  |
| H | 4.146956 | -2.600486 | 1.835804  |
| H | 4.786466 | -4.211802 | 1.397323  |
| F | 8.185024 | 0.354596  | -2.129863 |
| F | 6.066424 | -0.070109 | -2.977926 |
| B | 6.782898 | 0.181241  | -1.877127 |
| C | 5.589407 | 0.054493  | 0.922921  |
| N | 6.185702 | 1.329383  | -1.058731 |
| C | 6.131083 | 2.619976  | -1.449457 |
| C | 5.599304 | 3.370203  | -0.446980 |
| C | 5.391609 | 2.564165  | 0.611869  |
| C | 5.711634 | 1.296025  | 0.274824  |
| C | 6.477913 | 3.091196  | -2.863225 |
| H | 5.704567 | 2.953845  | -3.648128 |
| H | 7.338014 | 2.477608  | -3.206393 |
| H | 6.663880 | 4.186983  | -2.873228 |
| C | 5.538513 | 4.902858  | -0.554528 |
| H | 6.572024 | 5.150734  | -0.878224 |
| H | 5.394413 | 5.354527  | 0.450383  |
| C | 4.488926 | 5.455537  | -1.474301 |
| H | 4.668913 | 6.531392  | -1.682475 |
| H | 3.566628 | 5.290466  | -0.877768 |
| H | 4.480252 | 4.874748  | -2.421876 |
| C | 5.290993 | 3.132183  | 1.975619  |
| H | 4.268062 | 3.475746  | 2.238109  |
| H | 5.883194 | 4.071469  | 1.937754  |

|   |           |           |           |
|---|-----------|-----------|-----------|
| H | 5.643577  | 2.561035  | 2.860835  |
| C | 5.030179  | -0.046251 | 2.167161  |
| C | 5.694068  | -0.543975 | 3.233690  |
| H | 6.717427  | -0.871942 | 3.127809  |
| C | 5.133178  | -0.585617 | 4.503311  |
| H | 5.760637  | -0.828604 | 5.347554  |
| C | 3.845871  | -0.107092 | 4.666360  |
| H | 3.491978  | -0.138965 | 5.686852  |
| C | 3.732163  | 0.408552  | 2.402712  |
| H | 3.189630  | 0.780686  | 1.545561  |
| C | 3.101923  | 0.359790  | 3.603996  |
| H | 2.199757  | 0.918908  | 3.801519  |
| C | 2.789314  | -1.566446 | -1.233947 |
| H | 2.982973  | -0.511448 | -1.520785 |
| H | 3.706919  | -2.085022 | -0.883527 |
| H | 2.412888  | -2.207294 | -2.059375 |
| N | 0.896511  | -0.389669 | 0.012316  |
| C | 1.706013  | -1.516577 | -0.192716 |
| C | 1.145551  | -2.527272 | 0.624820  |
| C | 0.076077  | -2.064648 | 1.372466  |
| C | -0.070790 | -0.654292 | 1.062525  |
| C | 1.641076  | -3.913072 | 0.551027  |
| H | 2.616829  | -4.035378 | 0.034054  |
| H | 1.773551  | -4.441723 | 1.519549  |
| C | 0.694304  | -4.921775 | -0.150657 |
| H | 0.982730  | -5.933530 | 0.208188  |
| H | 0.698312  | -4.935530 | -1.261330 |
| H | -0.351043 | -4.730563 | 0.172230  |
| C | -0.768964 | -2.854086 | 2.310494  |
| H | -0.826512 | -2.412938 | 3.328788  |
| H | -1.806068 | -2.931755 | 1.918961  |
| H | -0.238350 | -3.825850 | 2.229688  |
| 9 | 2.178936  | 1.673103  | -0.447851 |
| 9 | 0.705404  | 0.853350  | -2.072926 |
| 5 | 0.950313  | 1.069883  | -0.676799 |
| C | -1.009622 | 0.384930  | 1.489038  |
| N | -0.169609 | 2.060738  | -0.068439 |
| C | -0.324890 | 3.412409  | -0.326909 |
| C | -1.393481 | 3.876336  | 0.475678  |
| C | -1.744760 | 2.840506  | 1.350549  |
| C | -1.029817 | 1.679081  | 0.971957  |
| C | 0.685192  | 4.208197  | -1.105093 |
| H | 0.437931  | 5.288191  | -1.017337 |
| H | 0.753887  | 3.877471  | -2.164188 |
| H | 1.694690  | 4.131072  | -0.648053 |
| C | -1.823432 | 5.315747  | 0.468881  |
| H | -2.892544 | 5.277223  | 0.768219  |
| H | -1.837725 | 5.823743  | -0.519453 |
| C | -1.143602 | 6.318926  | 1.385318  |
| H | -0.056821 | 6.301486  | 1.157408  |
| H | -1.286716 | 5.983992  | 2.435273  |
| H | -1.593604 | 7.334475  | 1.341315  |
| C | -2.641006 | 3.094944  | 2.516066  |
| H | -2.479468 | 4.156120  | 2.804431  |
| H | -2.376346 | 2.455619  | 3.385491  |
| H | -3.692442 | 2.878367  | 2.231457  |
| C | -1.820355 | 0.029053  | 2.492972  |

|   |           |           |           |
|---|-----------|-----------|-----------|
| C | -1.340703 | -0.161434 | 3.831965  |
| H | -0.294433 | -0.101187 | 4.094935  |
| C | -2.210983 | -0.439562 | 4.821398  |
| H | -1.794953 | -0.592235 | 5.806246  |
| C | -3.586677 | -0.588346 | 4.555791  |
| H | -4.187851 | -0.831324 | 5.420011  |
| C | -3.170995 | -0.130090 | 2.254310  |
| H | -3.571089 | -0.160458 | 1.251595  |
| C | -4.039945 | -0.375276 | 3.311323  |
| H | -4.988247 | -0.757542 | 2.965172  |
| C | -2.097687 | -3.133880 | -2.709347 |
| H | -2.229528 | -2.694774 | -3.720604 |
| H | -1.301427 | -2.572953 | -2.175258 |
| H | -1.773741 | -4.192088 | -2.805696 |
| N | -3.938505 | -1.705839 | -1.708605 |
| C | -3.389579 | -2.941933 | -1.879523 |
| C | -4.262131 | -3.862830 | -1.322256 |
| C | -5.342582 | -3.198811 | -0.813569 |
| C | -5.087692 | -1.827418 | -1.020889 |
| C | -4.039321 | -5.287154 | -1.283548 |
| H | -2.943781 | -5.404306 | -1.146320 |
| H | -4.597674 | -5.796499 | -0.469287 |
| C | -4.376800 | -5.919348 | -2.593452 |
| H | -3.729400 | -5.451019 | -3.365471 |
| H | -5.439381 | -5.664982 | -2.793672 |
| H | -4.185938 | -7.009757 | -2.505105 |
| C | -6.550431 | -3.935835 | -0.250177 |
| H | -7.445606 | -3.462859 | -0.707829 |
| H | -6.528606 | -4.961403 | -0.676822 |
| H | -6.531354 | -3.922787 | 0.861289  |
| 9 | -2.044340 | -0.339388 | -1.535603 |
| 9 | -3.083115 | -0.203515 | -3.626314 |
| 5 | -3.300173 | -0.325876 | -2.201534 |
| C | -5.898092 | -0.703465 | -0.648521 |
| N | -4.262639 | 0.844464  | -1.666303 |
| C | -4.183062 | 2.219846  | -1.928199 |
| C | -5.267673 | 2.850186  | -1.335922 |
| C | -6.031408 | 1.930545  | -0.744667 |
| C | -5.483085 | 0.622253  | -1.022908 |
| C | -2.958170 | 2.892517  | -2.599947 |
| H | -2.082678 | 2.228932  | -2.764695 |
| H | -2.664305 | 3.805682  | -2.040528 |
| H | -3.445410 | 3.194458  | -3.551715 |
| C | -5.450862 | 4.303049  | -1.273014 |
| H | -4.484517 | 4.778592  | -1.545934 |
| H | -5.542225 | 4.665064  | -0.226091 |
| C | -6.477973 | 4.890353  | -2.210952 |
| H | -6.457947 | 5.999801  | -2.156309 |
| H | -7.487457 | 4.645272  | -1.818670 |
| H | -6.473725 | 4.543618  | -3.267012 |
| C | -7.186242 | 2.331715  | 0.109045  |
| H | -8.090796 | 2.502789  | -0.513555 |
| H | -6.893046 | 3.254496  | 0.653594  |
| H | -7.300251 | 1.596077  | 0.933271  |
| C | -7.049307 | -0.882072 | 0.044912  |
| C | -7.179944 | -1.474930 | 1.311661  |
| H | -6.346198 | -1.901569 | 1.850997  |

|   |            |           |           |
|---|------------|-----------|-----------|
| C | -8.382980  | -1.575448 | 1.924826  |
| H | -8.492566  | -2.101786 | 2.860999  |
| C | -9.500223  | -1.156663 | 1.252593  |
| H | -10.469952 | -1.204356 | 1.723992  |
| C | -8.249679  | -0.552688 | -0.685569 |
| H | -8.268413  | -0.292916 | -1.734216 |
| C | -9.422406  | -0.559422 | -0.002291 |
| H | -10.343083 | -0.163803 | -0.405588 |

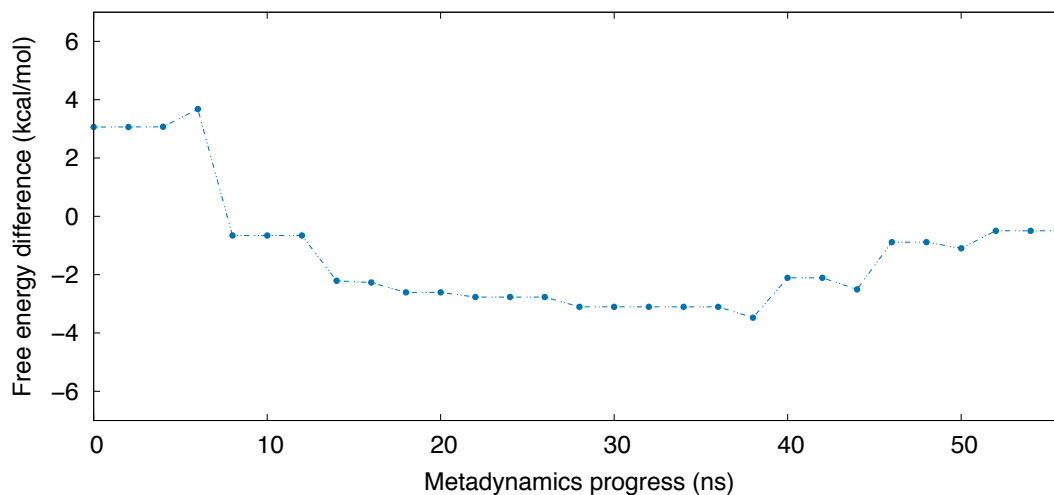

**Figure S1.** Free-energy convergence estimated from the free-energy difference between the four-sized nanoparticle free-energy basin and the six-sized nanoparticle free energy basin as a function of the metadynamics progress.

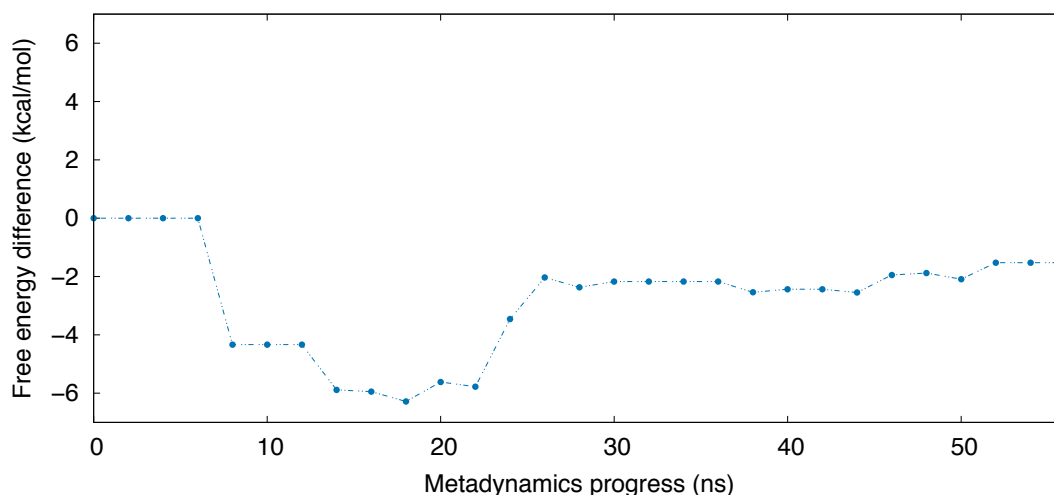

**Figure S2.** Free-energy convergence estimated from the free-energy difference between the four-sized free-energy nanoparticle basin and the five-sized nanoparticle free energy basin as a function of the metadynamics progress.

## References

1. S. Grimme, *J. Comput. Chem.*, 2006, **27**, 1787.
2. Gaussian 09, Revision D.01, M. J. Frisch *et al.*, Gaussian, Inc., Wallingford CT, 2009.
3. F. Furche, R. Ahlrichs, C. Wachsmann, E. Weber, A. Sobanski, F. Voegtle and S. Grimme, *J. Am. Chem. Soc.*, 2000, **122**, 1717.
4. R. Bauernschmitt and R. Ahlrichs, *Chem. Phys. Lett.*, 1996, **256**, 454.
5. S. Grimme, *Rev. Comput. Chem.*, 2004, **20**, 153.
